# Supplementary material for: Direct C–C coupling of two Ni-salphen complexes to yield dinickel-disalphen complexes with symmetric and non-symmetric substitution-patterns
Source: Royal Society of Chemistry journal article supplement (doi:10.1039/c5dt04612b), 2016-01-01
Supplement: c5dt04612b1.pdf [file c5dt04612b1.pdf]

## Supplementary material

### Crystallographic Information

Table S 1: Crystallographic data for compounds 4-8.

|                                                        | 4                                                                                    | 5                                                                 | 6                                                                | 7                                                                | 8                                                                                                                                                  |
|--------------------------------------------------------|--------------------------------------------------------------------------------------|-------------------------------------------------------------------|------------------------------------------------------------------|------------------------------------------------------------------|----------------------------------------------------------------------------------------------------------------------------------------------------|
| Formula                                                | C <sub>24</sub> H <sub>21</sub> BrN <sub>2</sub> NiO <sub>2</sub> ·CHCl <sub>3</sub> | C <sub>28</sub> H <sub>29</sub> BrN <sub>2</sub> NiO <sub>2</sub> | C <sub>30</sub> H <sub>33</sub> BN <sub>2</sub> NiO <sub>4</sub> | C <sub>34</sub> H <sub>41</sub> BN <sub>2</sub> NiO <sub>4</sub> | C <sub>48</sub> H <sub>42</sub> N <sub>4</sub> Ni <sub>2</sub> O <sub>4</sub> ·2(C <sub>5</sub> H <sub>5</sub> N) (C <sub>6</sub> H <sub>6</sub> ) |
| Weight [g/mol]                                         | 627.41                                                                               | 564.15                                                            | 555.10                                                           | 611.21                                                           | 1092.58                                                                                                                                            |
| Temperature [K]                                        | 100.1(1)                                                                             | 100.1(1)                                                          | 100.1(1)                                                         | 100.1(1)                                                         | 100.1(1)                                                                                                                                           |
| Radiation                                              | Mo Kα                                                                                | Mo Kα                                                             | Mo Kα                                                            | Mo Kα                                                            | Mo Kα                                                                                                                                              |
| Space group                                            | <i>P</i> $\bar{1}$                                                                   | <i>P</i> 2/ <i>c</i>                                              | <i>P</i> 2 <sub>1</sub> / <i>c</i>                               | <i>P</i> 2 <sub>1</sub> / <i>c</i>                               | <i>P</i> 2 <sub>1</sub> / <i>c</i>                                                                                                                 |
| a [Å]                                                  | 13.3441(2)                                                                           | 24.5626(2)                                                        | 15.4727(4)                                                       | 14.4687(1)                                                       | 16.4203(2)                                                                                                                                         |
| b [Å]                                                  | 17.1747(3)                                                                           | 6.7022(1)                                                         | 13.7843(3)                                                       | 24.9127(2)                                                       | 8.0156(1)                                                                                                                                          |
| c [Å]                                                  | 23.5777(4)                                                                           | 31.2584(3)                                                        | 14.1565(3)                                                       | 17.5423(2)                                                       | 20.0126(3)                                                                                                                                         |
| α [°]                                                  | 84.506(1)                                                                            | -                                                                 | -                                                                | -                                                                | -                                                                                                                                                  |
| β [°]                                                  | 76.205(1)                                                                            | 95.08(1)                                                          | 114.416(3)                                                       | 92.753(1)                                                        | 10.66(1)                                                                                                                                           |
| γ [°]                                                  | 76.103(1)                                                                            | -                                                                 | -                                                                | -                                                                | -                                                                                                                                                  |
| V [Å <sup>3</sup> ]                                    | 5089.85(15)                                                                          | 5125.61(7)                                                        | 2749.28(11)                                                      | 6315.90(10)                                                      | 2588.55(6)                                                                                                                                         |
| Z                                                      | 8                                                                                    | 8                                                                 | 4                                                                | 8                                                                | 2                                                                                                                                                  |
| D [Mg/m <sup>3</sup> ]                                 | 1.638                                                                                | 1.462                                                             | 1.341                                                            | 1.286                                                            | 1.402                                                                                                                                              |
| μ [mm <sup>-1</sup> ]                                  | 2.67                                                                                 | 2.34                                                              | 0.74                                                             | 0.65                                                             | 0.79                                                                                                                                               |
| F(000)                                                 | 2528                                                                                 | 2320                                                              | 1168                                                             | 2592                                                             | 1144                                                                                                                                               |
| θ [°]                                                  | 1.8 – 27.4                                                                           | 2.2 – 35.5                                                        | 2.9 – 25                                                         | 1.4 – 28.5                                                       | 2.2 – 32.8                                                                                                                                         |
| h                                                      | -17 → 17                                                                             | -39 → 39                                                          | -18 → 13                                                         | -19 → 19                                                         | -25 → 25                                                                                                                                           |
| k                                                      | -22 → 22                                                                             | -10 → 8                                                           | -15 → 16                                                         | -32 → 33                                                         | -12 → 12                                                                                                                                           |
| l                                                      | -30 → 30                                                                             | -43 → 51                                                          | -12 → 16                                                         | -22 → 23                                                         | -31 → 30                                                                                                                                           |
| Reflexes                                               | 105227                                                                               | 103118                                                            | 13164                                                            | 105742                                                           | 66118                                                                                                                                              |
| Indep. refl. (I>2σ)                                    | 22932 (15397)                                                                        | 21035 (16132)                                                     | 4844 (4344)                                                      | 15108 (11096)                                                    | 9902 (7237)                                                                                                                                        |
| R <sub>int</sub>                                       | 0.077                                                                                | 0.023                                                             | 0.028                                                            | 0.043                                                            | 0.049                                                                                                                                              |
| Refinement                                             | FMLS on F <sup>2</sup>                                                               | FMLS on F <sup>2</sup>                                            | FMLS on F <sup>2</sup>                                           | FMLS on F <sup>2</sup>                                           | FMLS on F <sup>2</sup>                                                                                                                             |
| Parameter                                              | 1237                                                                                 | 625                                                               | 377                                                              | 816                                                              | 356                                                                                                                                                |
| R <sub>1</sub> (I>2σ)                                  | 0.041                                                                                | 0.032                                                             | 0.048                                                            | 0.038                                                            | 0.041                                                                                                                                              |
| wR <sub>2</sub>                                        | 0.090                                                                                | 0.085                                                             | 0.120                                                            | 0.103                                                            | 0.109                                                                                                                                              |
| ρ <sub>min</sub> /ρ <sub>max</sub> [e/Å <sup>3</sup> ] | -0.60/1.14                                                                           | -0.58/1.19                                                        | -0.84/0.96                                                       | -0.38/0.37                                                       | -0.39/0.53                                                                                                                                         |
| CCDC                                                   | 1053849                                                                              | 1053735                                                           | 1053850                                                          | 1053745                                                          | 1053865                                                                                                                                            |

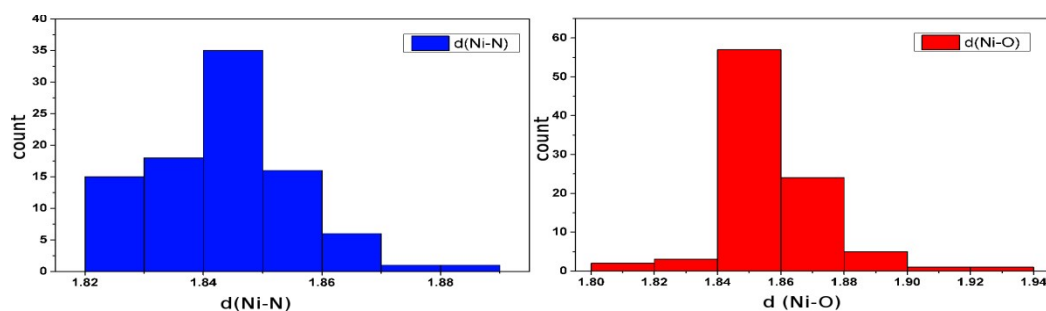

Figure S 1: Histograms for Ni-N and Ni-O bond-lengths taken from 93 Nickel(II)salophene-complexes published in the CCDC.

Table S2: Selected bond-lengths in the crystal-structures and the relaxed structures acquired by DFT-calculations of 4-8. Bond-lengths are given in Angströms.

\*) The bond-lengths are averaged over more than one molecule in the asymmetric unit. #) Torsion-angle of

|                                     | 4*         |        | 5*         |        | 6          |        | 7*         |        | 8                |                   |
|-------------------------------------|------------|--------|------------|--------|------------|--------|------------|--------|------------------|-------------------|
| $d_{\text{Ni-N1}}$                  | 1.8624(26) | 1.8826 | 1.8593(10) | 1.8861 | 1.8556(23) | 1.8817 | 1.8602(15) | 1.8806 | 1.8607(12)       | 1.8628            |
| $d_{\text{Ni-N2}}$                  | 1.8605(26) | 1.8798 | 1.8525(10) | 1.8711 | 1.8549(25) | 1.8803 | 1.8505(15) | 1.8715 | 1.8580(13)       | 1.8626            |
| $d_{\text{Ni-O1}}$                  | 1.8501(22) | 1.8606 | 1.8441(09) | 1.8629 | 1.8437(22) | 1.8605 | 1.8418(12) | 1.8627 | 1.8425(11)       | 1.8577            |
| $d_{\text{Ni-O2}}$                  | 1.8458(22) | 1.8558 | 1.8370(09) | 1.8562 | 1.8330(19) | 1.8569 | 1.8315(13) | 1.8574 | 1.8368(11)       | 1.8562            |
| $d_{\text{N1-C7}}$                  | 1.3011(40) | 1.3057 | 1.3052(15) | 1.3051 | 1.2987(39) | 1.3062 | 1.3086(23) | 1.3056 | 1.3116(19)       | 1.3276            |
| $d_{\text{N2-C14}}$                 | 1.3037(40) | 1.3090 | 1.3060(15) | 1.3091 | 1.3047(37) | 1.3086 | 1.3109(23) | 1.3087 | 1.3107(19)       | 1.3284            |
| $d_{\text{C4-C4'}}$                 | -          | -      | -          | -      | -          | -      | -          | -      | 1.4831(29)       | 1.4848            |
| $d_{\text{C4-B1}}$                  | -          | -      | -          | -      | 1.5508(50) | 1.5438 | 1.5406(27) | 1.5444 | -                | -                 |
| $\acute{\alpha}_{\text{O1-Ni1-N1}}$ | 95.03(11)  | 94.64  | 95.41(04)  | 94.72  | 95.17(10)  | 94.69  | 95.50(06)  | 94.76  | 95.29(05)        | 95.20             |
| $\acute{\alpha}_{\text{O2-Ni1-N2}}$ | 95.11(11)  | 94.72  | 94.66(04)  | 94.21  | 95.06(10)  | 94.69  | 94.66(06)  | 94.20  | 95.15(05)        | 95.26             |
| $\acute{\alpha}_{\text{O2-Ni1-O1}}$ | 84.01(11)  | 84.82  | 83.84(04)  | 85.10  | 83.52(10)  | 84.80  | 83.67(06)  | 85.09  | 83.43(05)        | 82.98             |
| $\acute{\alpha}_{\text{N2-Ni1-N1}}$ | 85.95(11)  | 85.82  | 86.16(04)  | 85.97  | 86.31(10)  | 85.82  | 86.22(06)  | 85.96  | 86.18(05)        | 86.58             |
| $\acute{O}_{\acute{\alpha}}$        | 360.10     | 360.00 | 360.07     | 360.00 | 360.06     | 360.00 | 360.04     | 360.00 | 360.05           | 360.01            |
| $\phi_{\text{C3-C4-B1-O4}}$         | -          | -      | -          | -      | 4.3        | 4.5    | 4.1        | 3.7    | 0.0 <sup>#</sup> | 36.3 <sup>#</sup> |

## UV/Vis data

Table S 3: Parameters for the Gauss-fits of the UV/Vis-spectra of compounds **4-9/10**. max: Peak-maximum (nm), wdt: Full-width-half-maximum (nm), h: Peak-height, A: Peak-area.

|             | band 1 |      |     |     | band 2 |      |     |     | band 3 |      |     |     | band 4 |      |     |     | band 5 |      |    |    |
|-------------|--------|------|-----|-----|--------|------|-----|-----|--------|------|-----|-----|--------|------|-----|-----|--------|------|----|----|
|             | max    | wdt  | ht  | A   | max    | wdt  | h   | A   | max    | wdt  | h   | A   | max    | wdt  | h   | A   | max    | wdt  | h  | A  |
| <b>4</b>    | 519    | 88.3 | 3.7 | 3.5 | 494    | 41.4 | 3.5 | 1.6 | 445    | 88.3 | 6.6 | 6.2 | 384    | 17.7 | 6.7 | 1.3 | 373    | 51.9 | 23 | 13 |
| <b>5</b>    | 530    | 82.2 | 3.6 | 3.1 | 496    | 42.4 | 3.8 | 1.7 | 445    | 88.3 | 6.8 | 6.4 | 383    | 21.2 | 7.0 | 1.6 | 371    | 59.0 | 20 | 13 |
| <b>6</b>    | 525    | 88.3 | 2.6 | 2.1 | 491    | 51.6 | 4.8 | 2.6 | 447    | 88.3 | 7.9 | 7.4 | 382    | 17.7 | 8.2 | 1.6 | 370    | 50.0 | 27 | 14 |
| <b>7</b>    | 529    | 87.6 | 2.4 | 2.2 | 493    | 55.8 | 4.8 | 2.9 | 445    | 88.3 | 7.1 | 6.7 | 382    | 17.7 | 8.1 | 1.5 | 371    | 53.6 | 25 | 14 |
| <b>8</b>    | 534    | 76.5 | 12  | 9.8 | 502    | 42.4 | 12  | 5.6 | 456    | 63.4 | 1.6 | 11  | 387    | 17.7 | 21  | 3.9 | 377    | 63.0 | 54 | 36 |
| <b>9/10</b> | 533    | 76.5 | 11  | 9.0 | 503    | 38.7 | 8.4 | 3.5 | 459    | 78.0 | 15  | 13  | 387    | 17.7 | 19  | 3.6 | 376    | 61.8 | 50 | 33 |

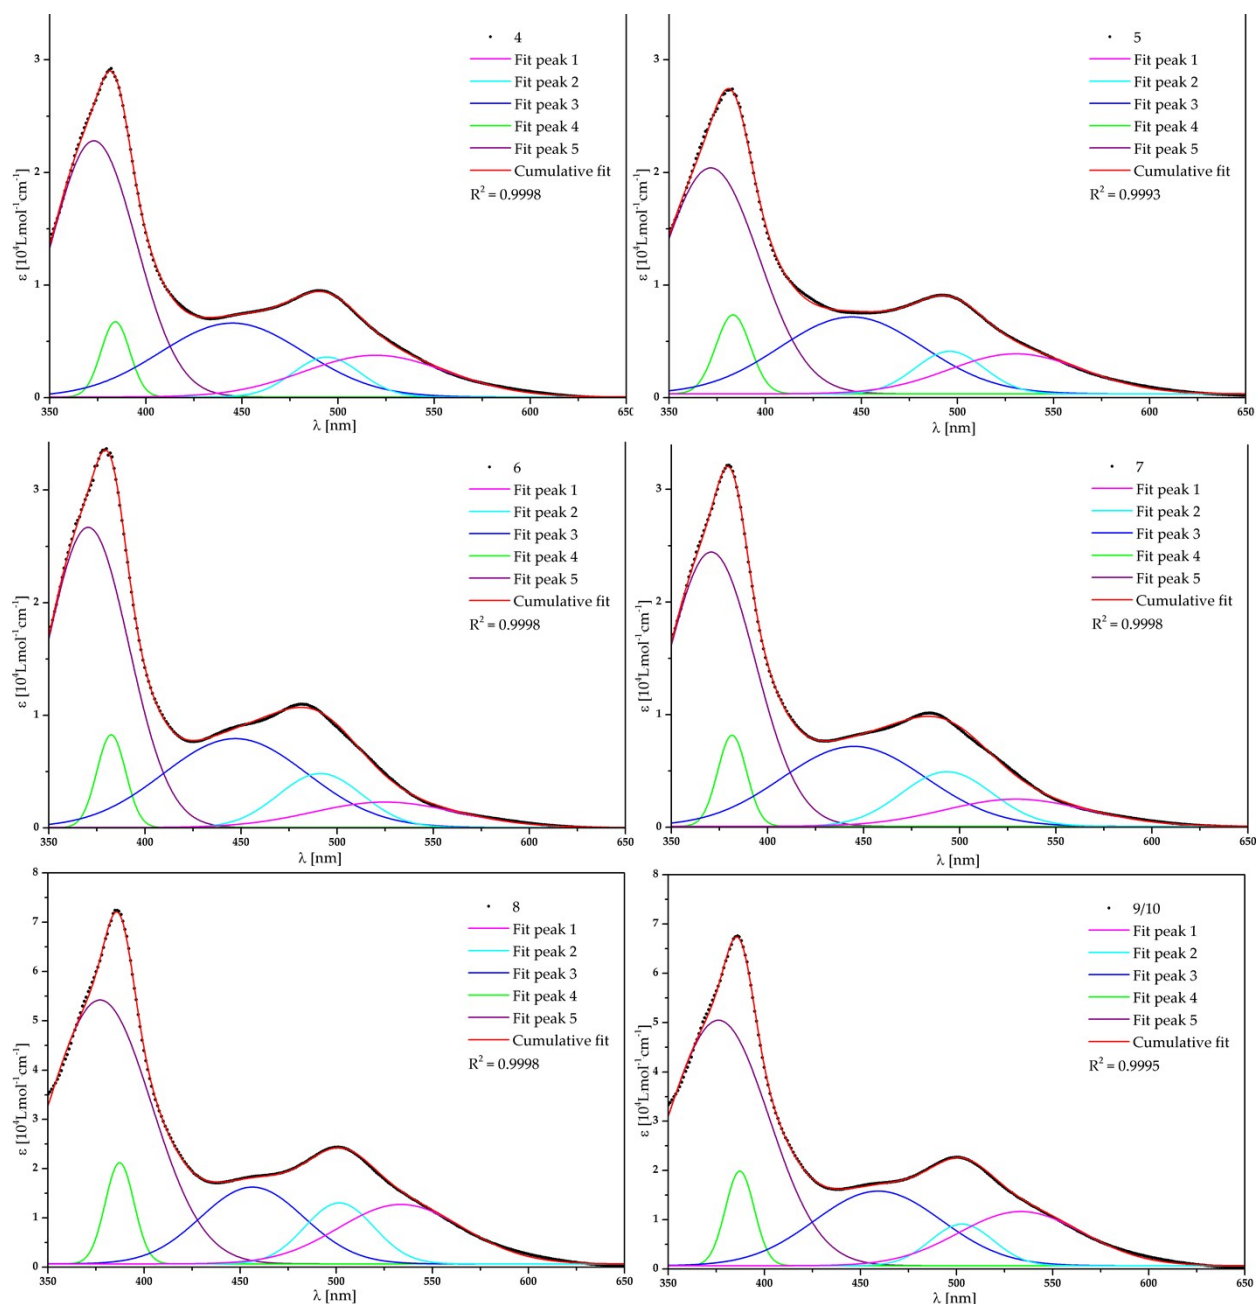

Figure S 2: Experimental UV/Vis-spectra including the Gaussian deconvolution. Top-left: **4**, top, right: **5**, middle-left: **6**, middle-right: **7**, bottom-left: **8**, bottom-right: **9/10**.

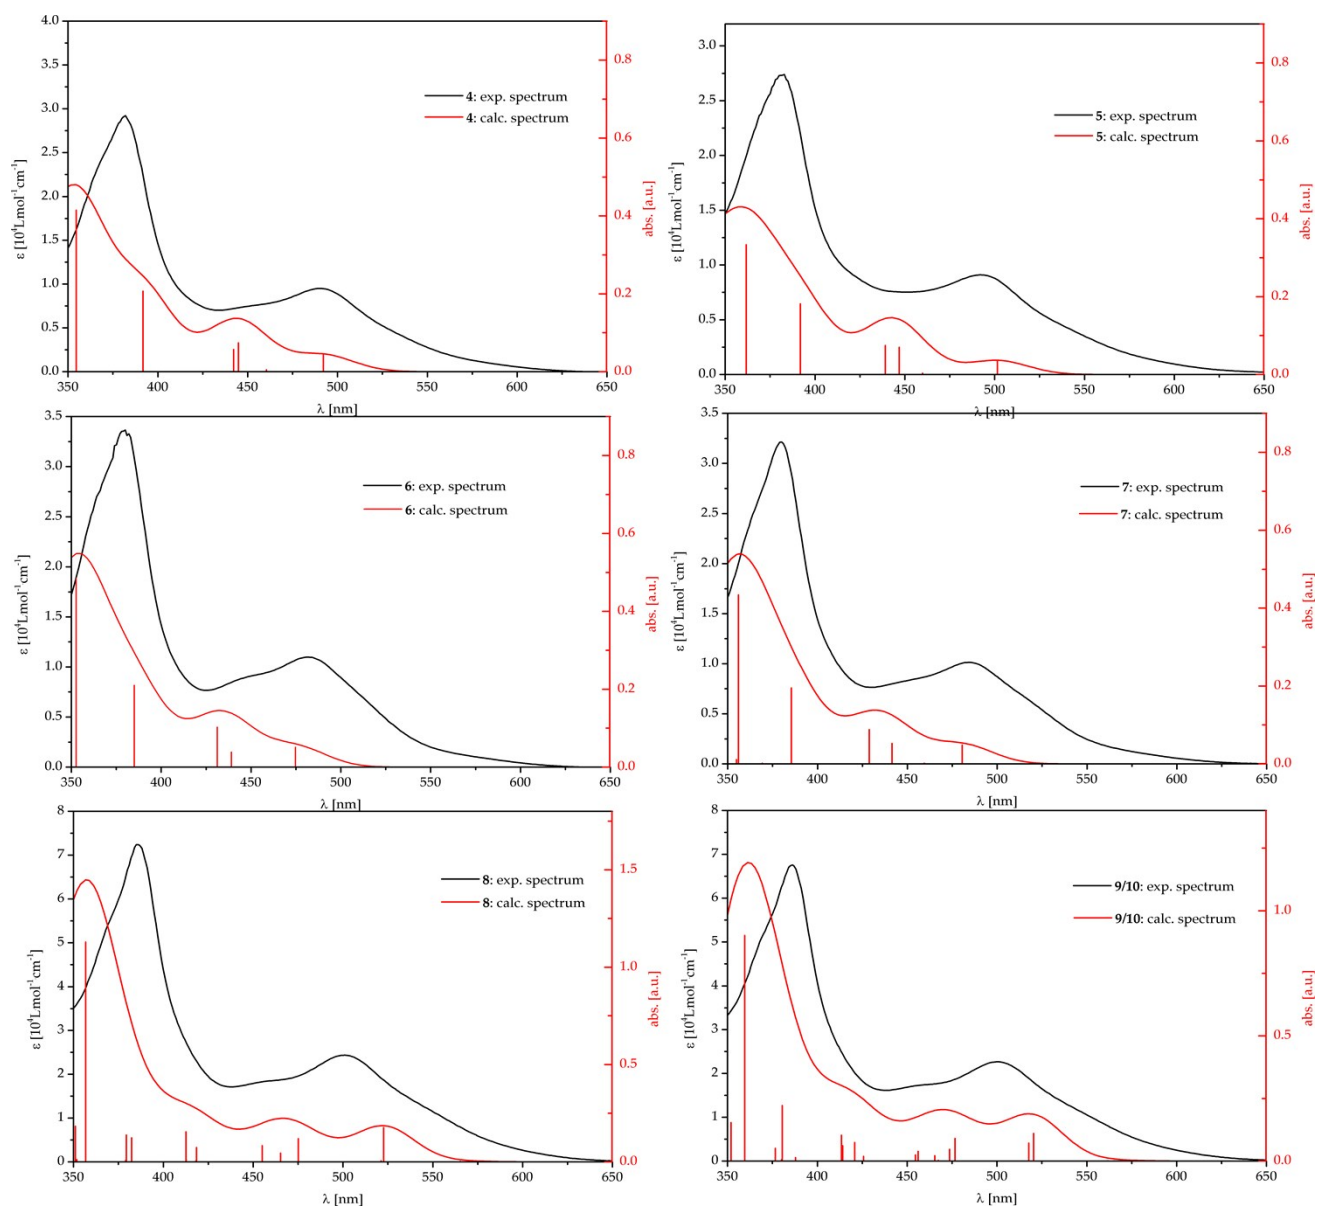

Figure S 3: Experimental electronic (black) and TD-DFT (red) spectra of compounds **4-9/10**. Top-left: **4**, top, right: **5**, middle-left: **6**, middle-right: **7**, bottom-left: **8**, bottom-right: **9/10**.

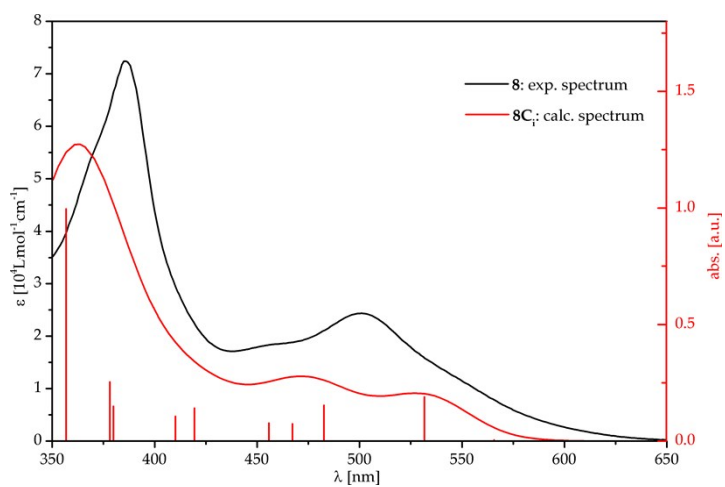

Figure S 4: Experimental electronic (black) and TD-DFT (red) spectra of compound **8 Ci**.

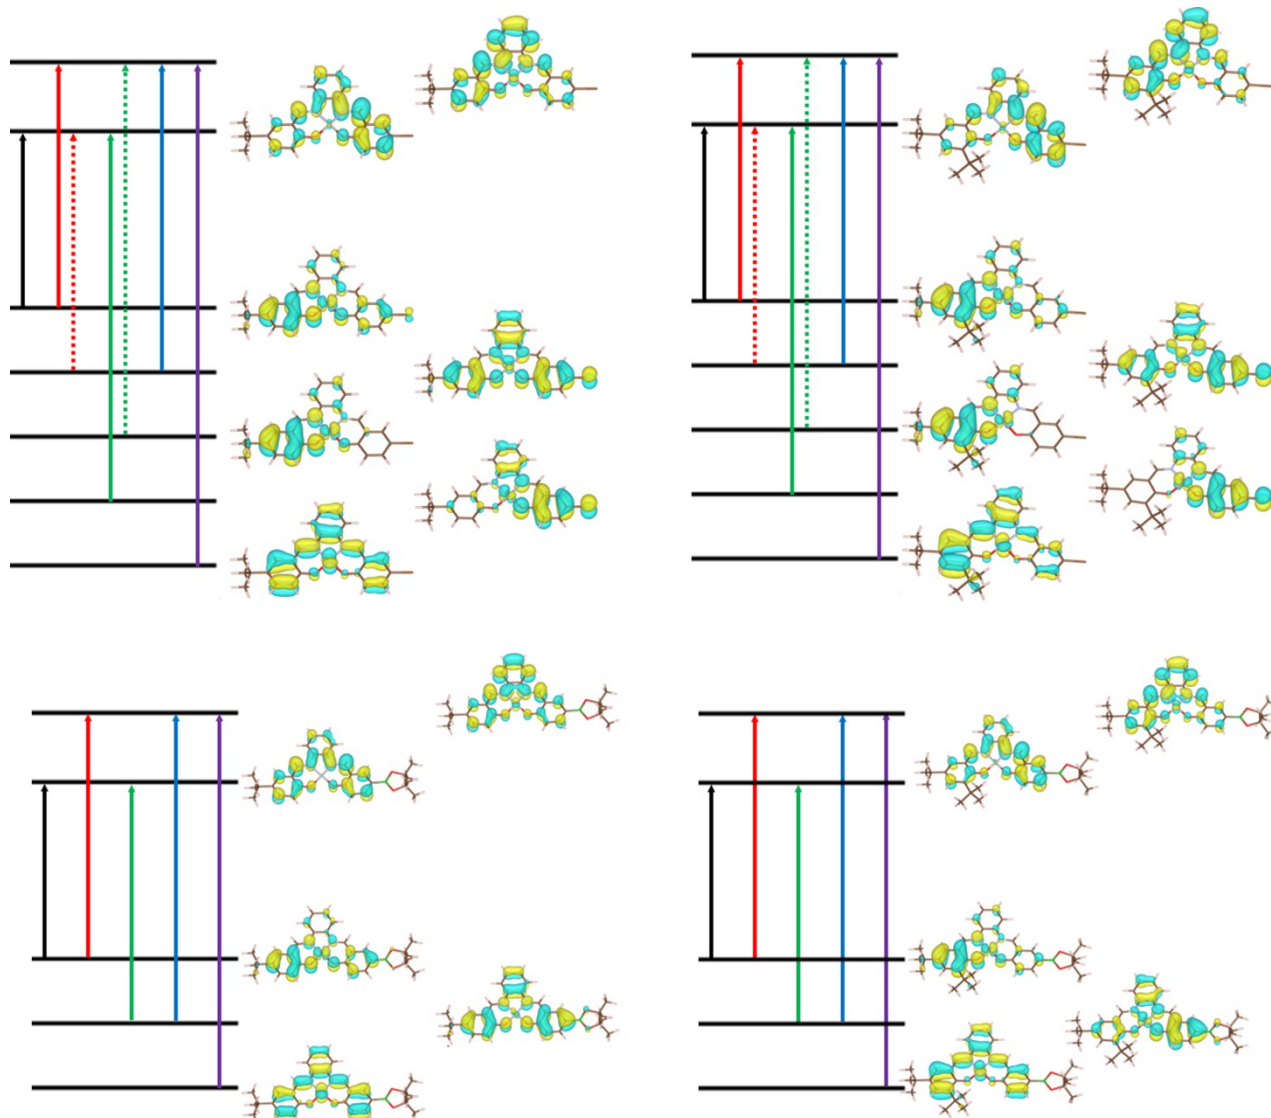

Figure S 5: NTOs for the mononuclear compounds. Top-left: **4**, top, right: **5**, bottom-left: **6**, bottom right: **7**. The five transition represented in each diagram correspond to the observed absorption-bands in the experimental UV/Vis-Spectra.

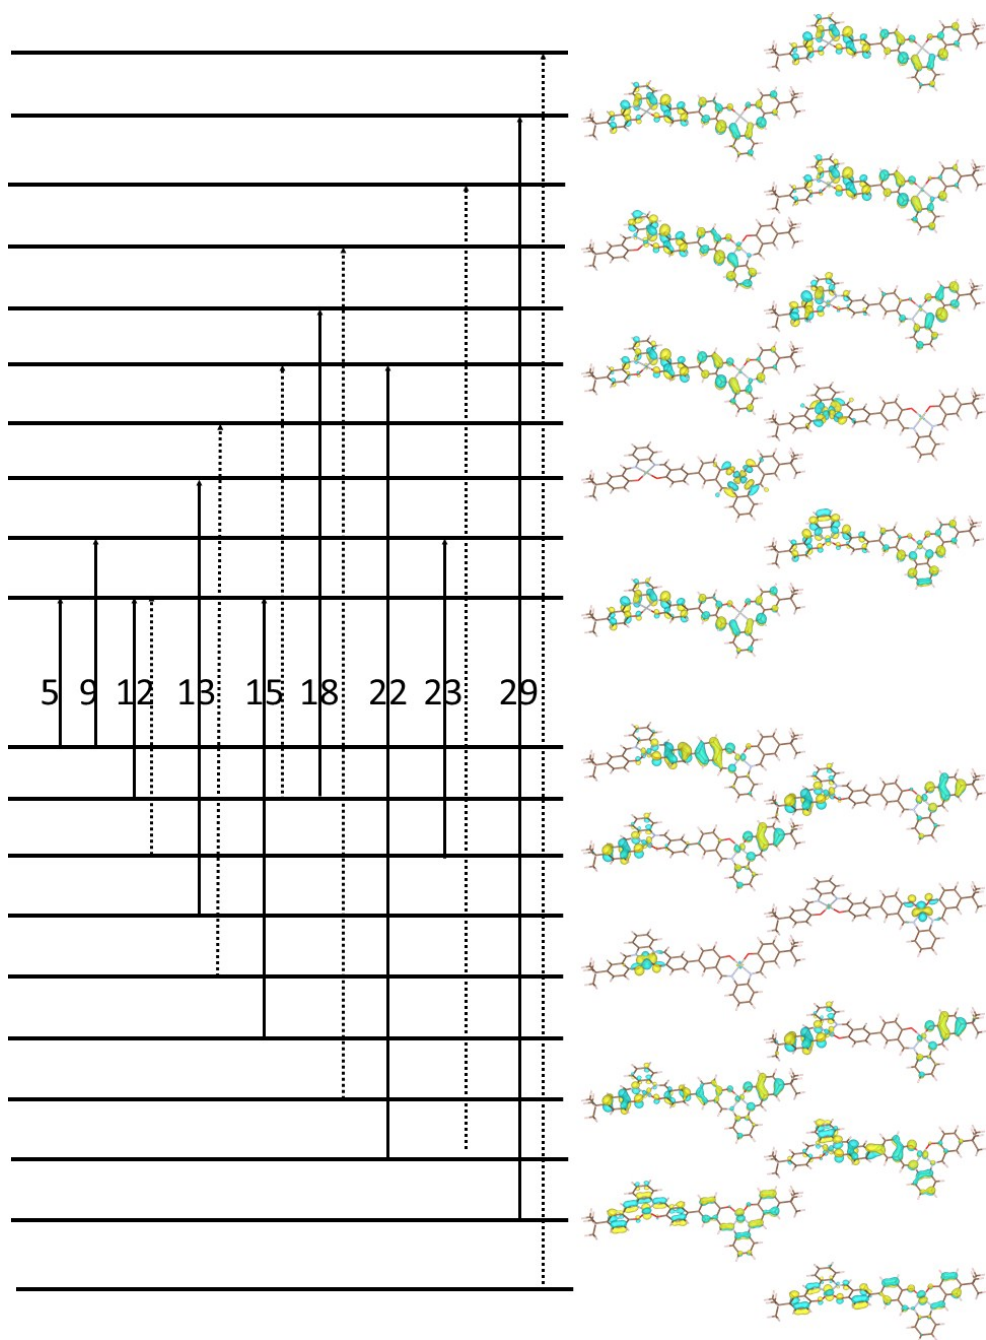

Figure S 6: NTOs for the dinuclear compound **8**. The observed electronic transitions are represented.

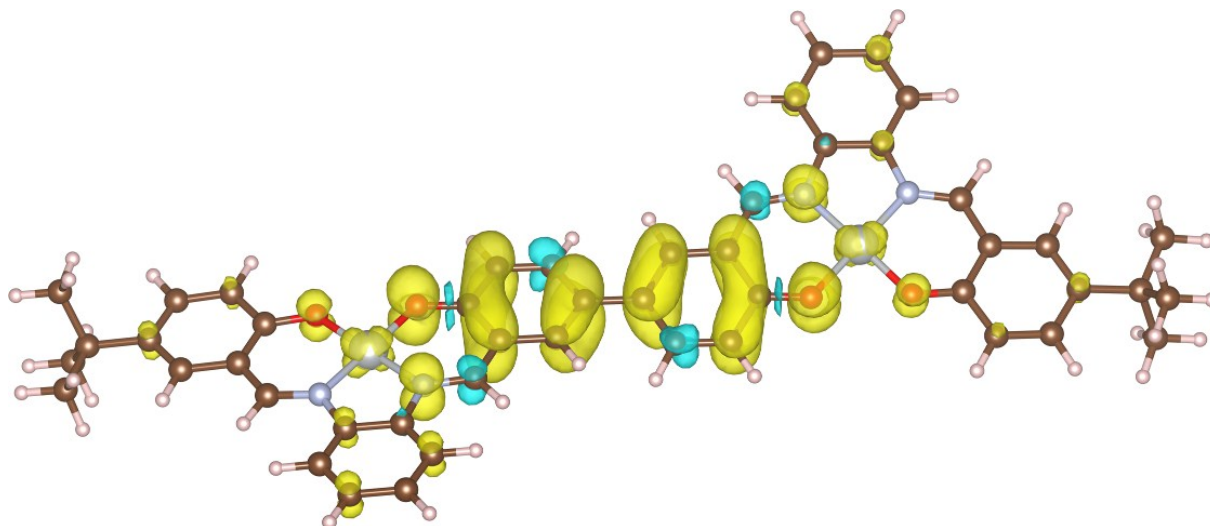

Figure S 7: DFT-spin density of the hypothetical monocation **8**<sup>+</sup>.

## NMR-Data

Table S 4: Selected <sup>1</sup>H (<sup>13</sup>C) chemical shifts for compounds **4-11**. Data are given in ppm. Due to poor solubility no <sup>13</sup>C data is available for **9-11**. The <sup>13</sup>C shifts of the C4-atom in compounds **4** and **6** couldn't be determined.

|     | <b>4</b>        | <b>5</b>        | <b>6</b>        | <b>7</b>        | <b>9+10</b>   | <b>11</b> |
|-----|-----------------|-----------------|-----------------|-----------------|---------------|-----------|
| C1  | -<br>(-)        | (166.8)         | (169.8)         | (170.2)         | -<br>(-)      | -<br>(-)  |
| C20 | -<br>(-)        | (166.3)         | (166.4)         | (165.6)         | -<br>(-)      | -<br>(-)  |
| C7  | 8.56<br>(155.4) | 8.60<br>(154.9) | 8.62<br>(156.2) | 8.67<br>(156.0) | 8.68,<br>8.61 | 8.71      |
| C14 | 8.50<br>(156.1) | 8.47<br>(155.9) | 8.56<br>(155.8) | 8.52<br>(155.8) | 8.49,<br>8.47 | 8.55      |
| C2  | 6.79<br>(124.1) | 6.77<br>(124.0) | 6.84<br>(~121)  | 6.84<br>(121.4) | 6.98,<br>6.91 | 6.99-6.96 |
| C3  | 7.23<br>(136.7) | 7.25<br>(137.4) | 7.53<br>(140.6) | 7.55<br>(140.3) | -<br>(-)      | -<br>(-)  |
| C4  | -<br>(-)        | -<br>(106.0)    | -<br>(-)        | -<br>(122.0)    | -<br>(-)      | -<br>(-)  |
| C5  | 7.54 (134.5)    | 7.55 (135.3)    | 7.92 (143.7)    | 7.95 (143.7)    | -<br>(-)      | -<br>(-)  |
| C16 | 7.35<br>(128.2) | ~7.2<br>(127.3) | 7.37<br>(129.1) | 7.23<br>(127.8) | -<br>(-)      | -<br>(-)  |
| C17 | -<br>(137.8)    | -<br>(137.1)    | -<br>(137.8)    | -<br>(137.2)    | -<br>(-)      | -<br>(-)  |
| C18 | 7.36<br>(133.4) | 7.39<br>(130.6) | 7.35<br>(134.1) | 7.39<br>(130.5) | -<br>(-)      | -<br>(-)  |
| C19 | 6.84<br>(121.7) | -<br>(141.1)    | 6.85<br>(~121)  | -<br>(141.3)    | 6.86<br>(-)   | -<br>(-)  |

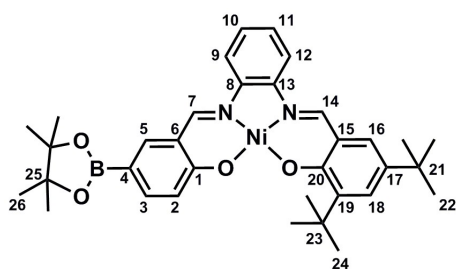

Scheme S1: Numbering-pattern for NMR-peak-assignment.

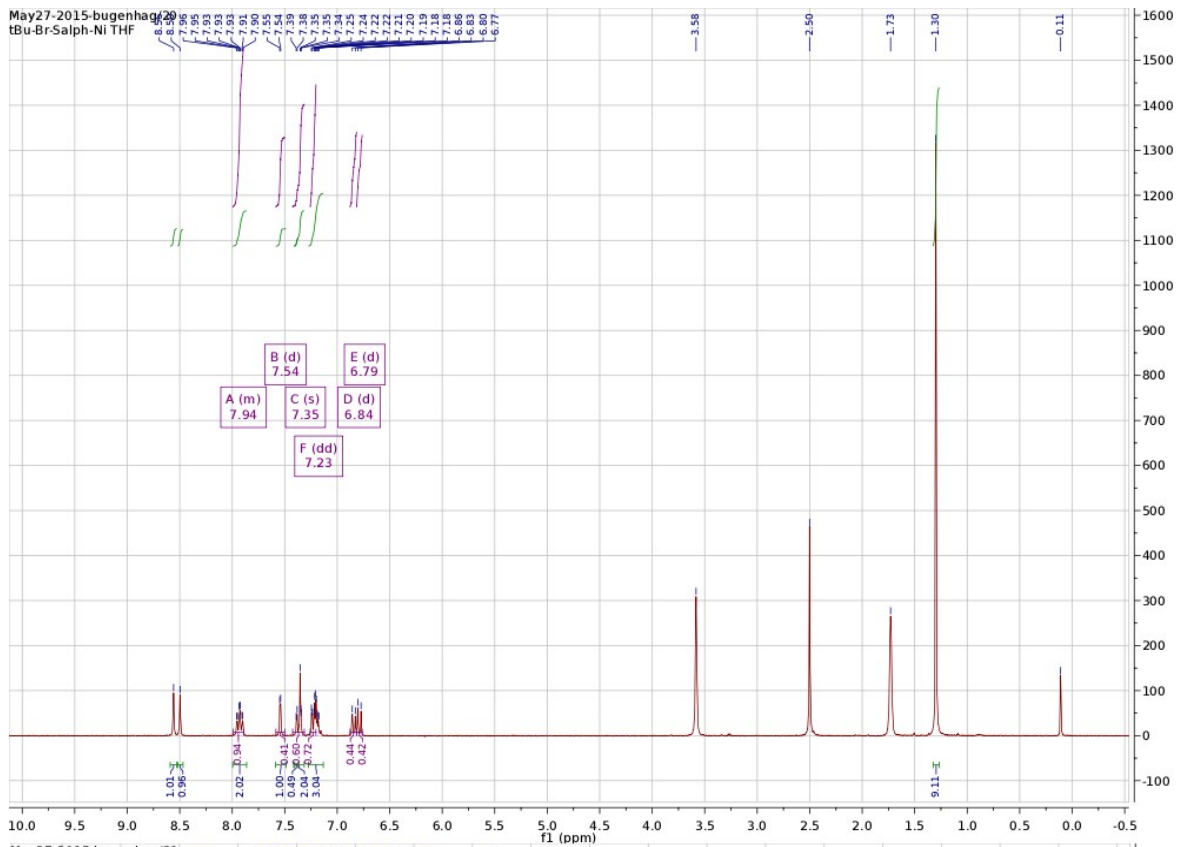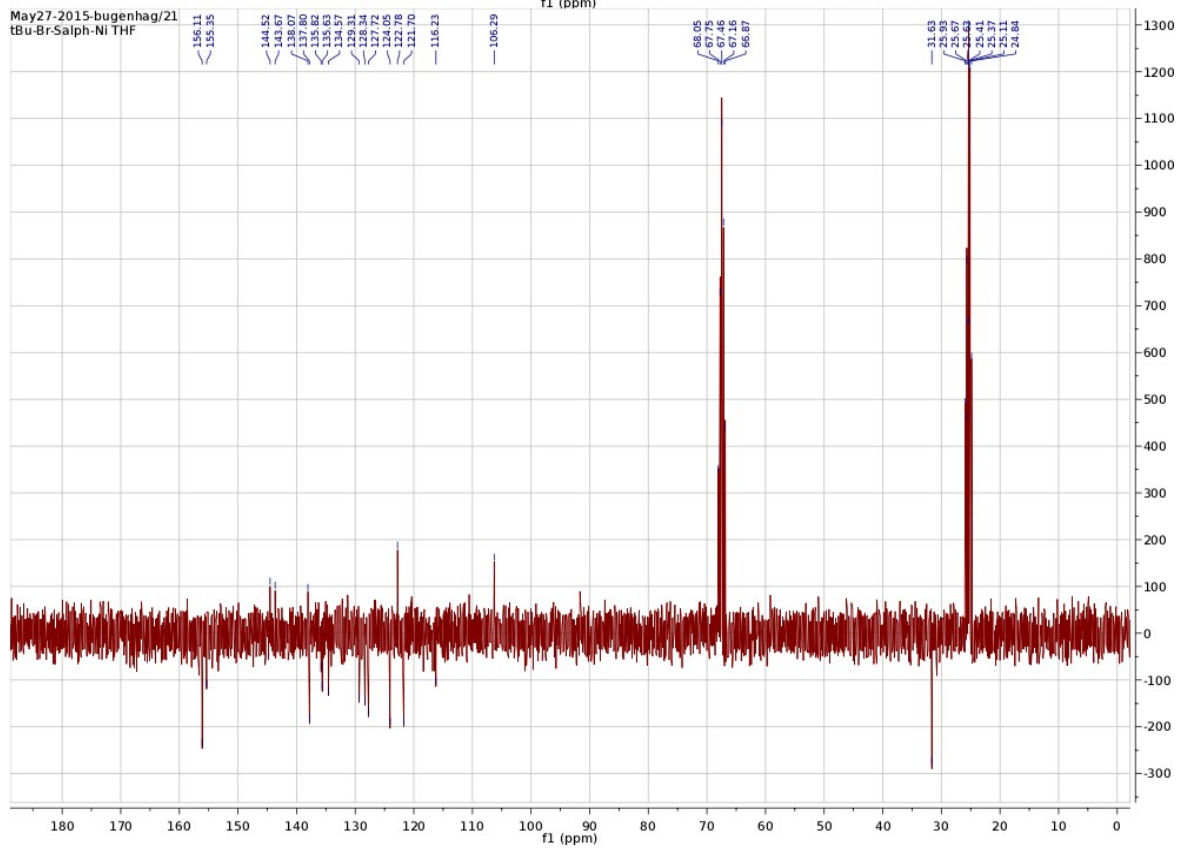

Figure S8: <sup>1</sup>H (top) and <sup>13</sup>C-DEPTQ (bottom)-spectra of **4** measured in THF-d<sub>8</sub>.



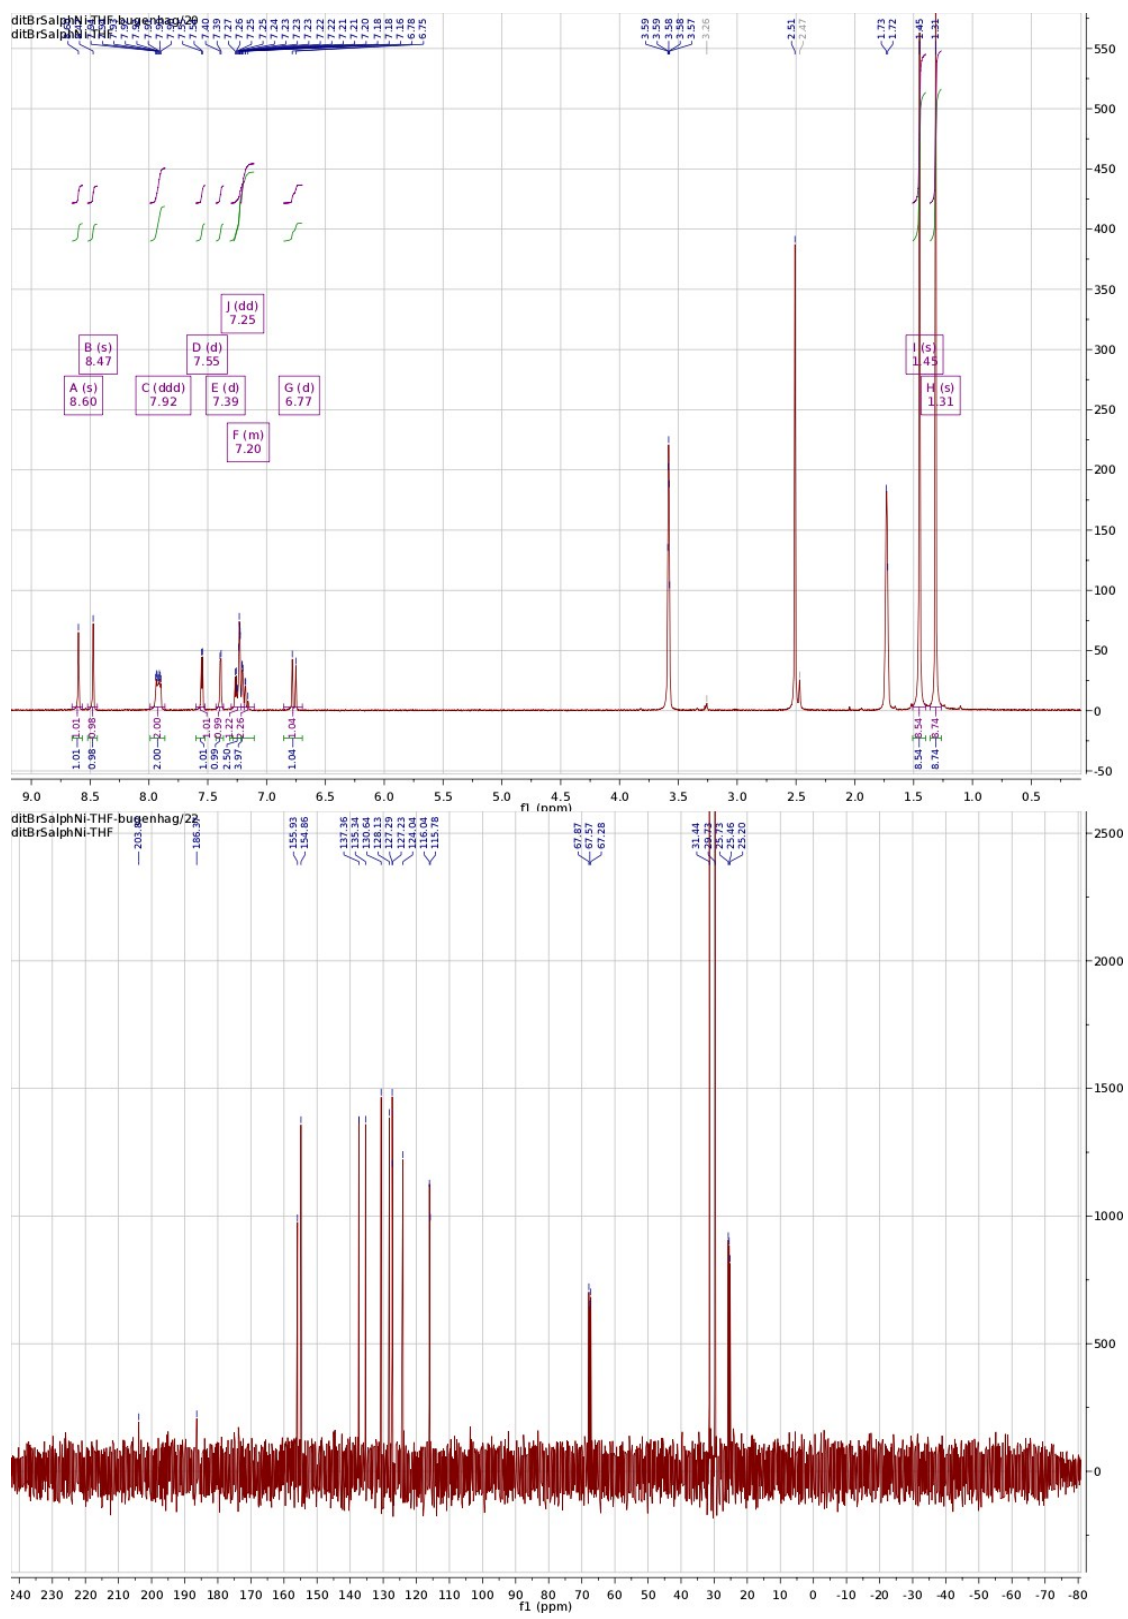

Figure S9:  $^1\text{H}$  (top) and  $^{13}\text{C}$ -DEPT135 (bottom)-spectra of **5** measured in  $\text{THF-d}_8$ .

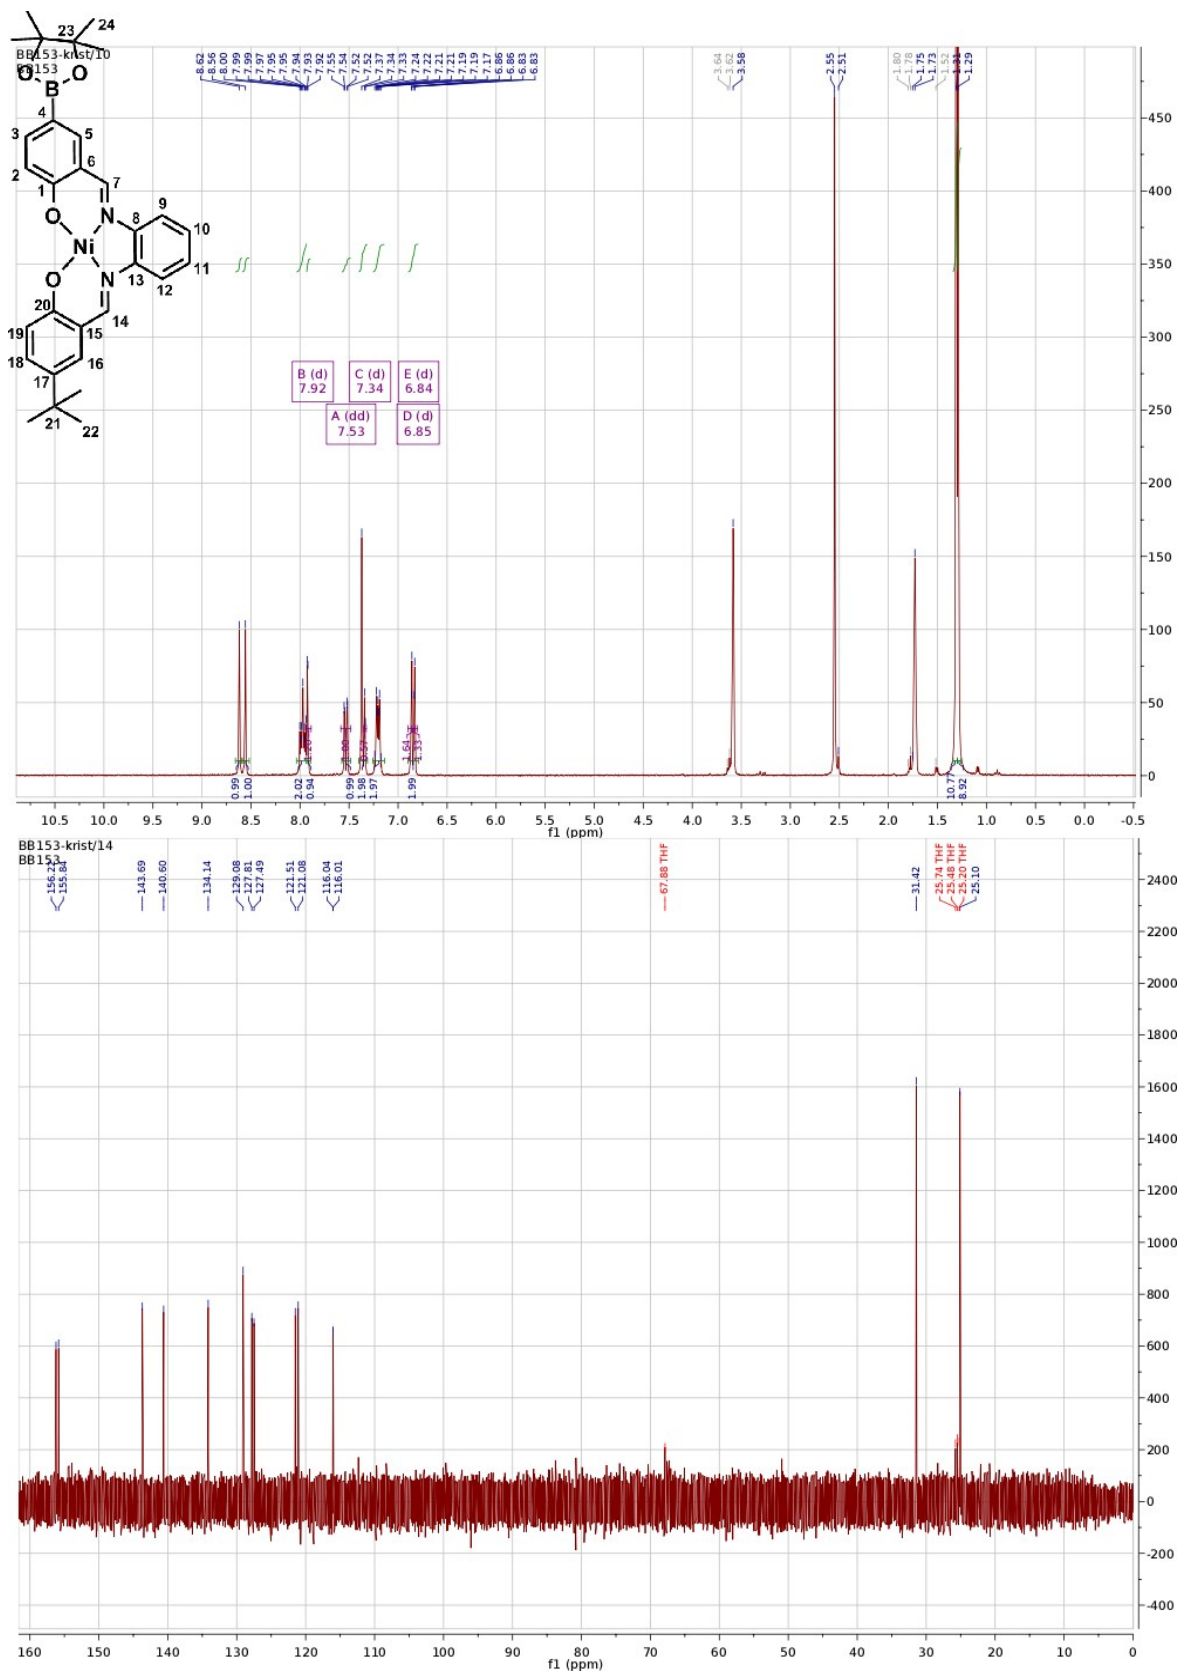

Figure S10:  $^1\text{H}$  (top) and  $^{13}\text{C}$  (bottom)-spectra of **6** measured in  $\text{THF-d}_6$ .

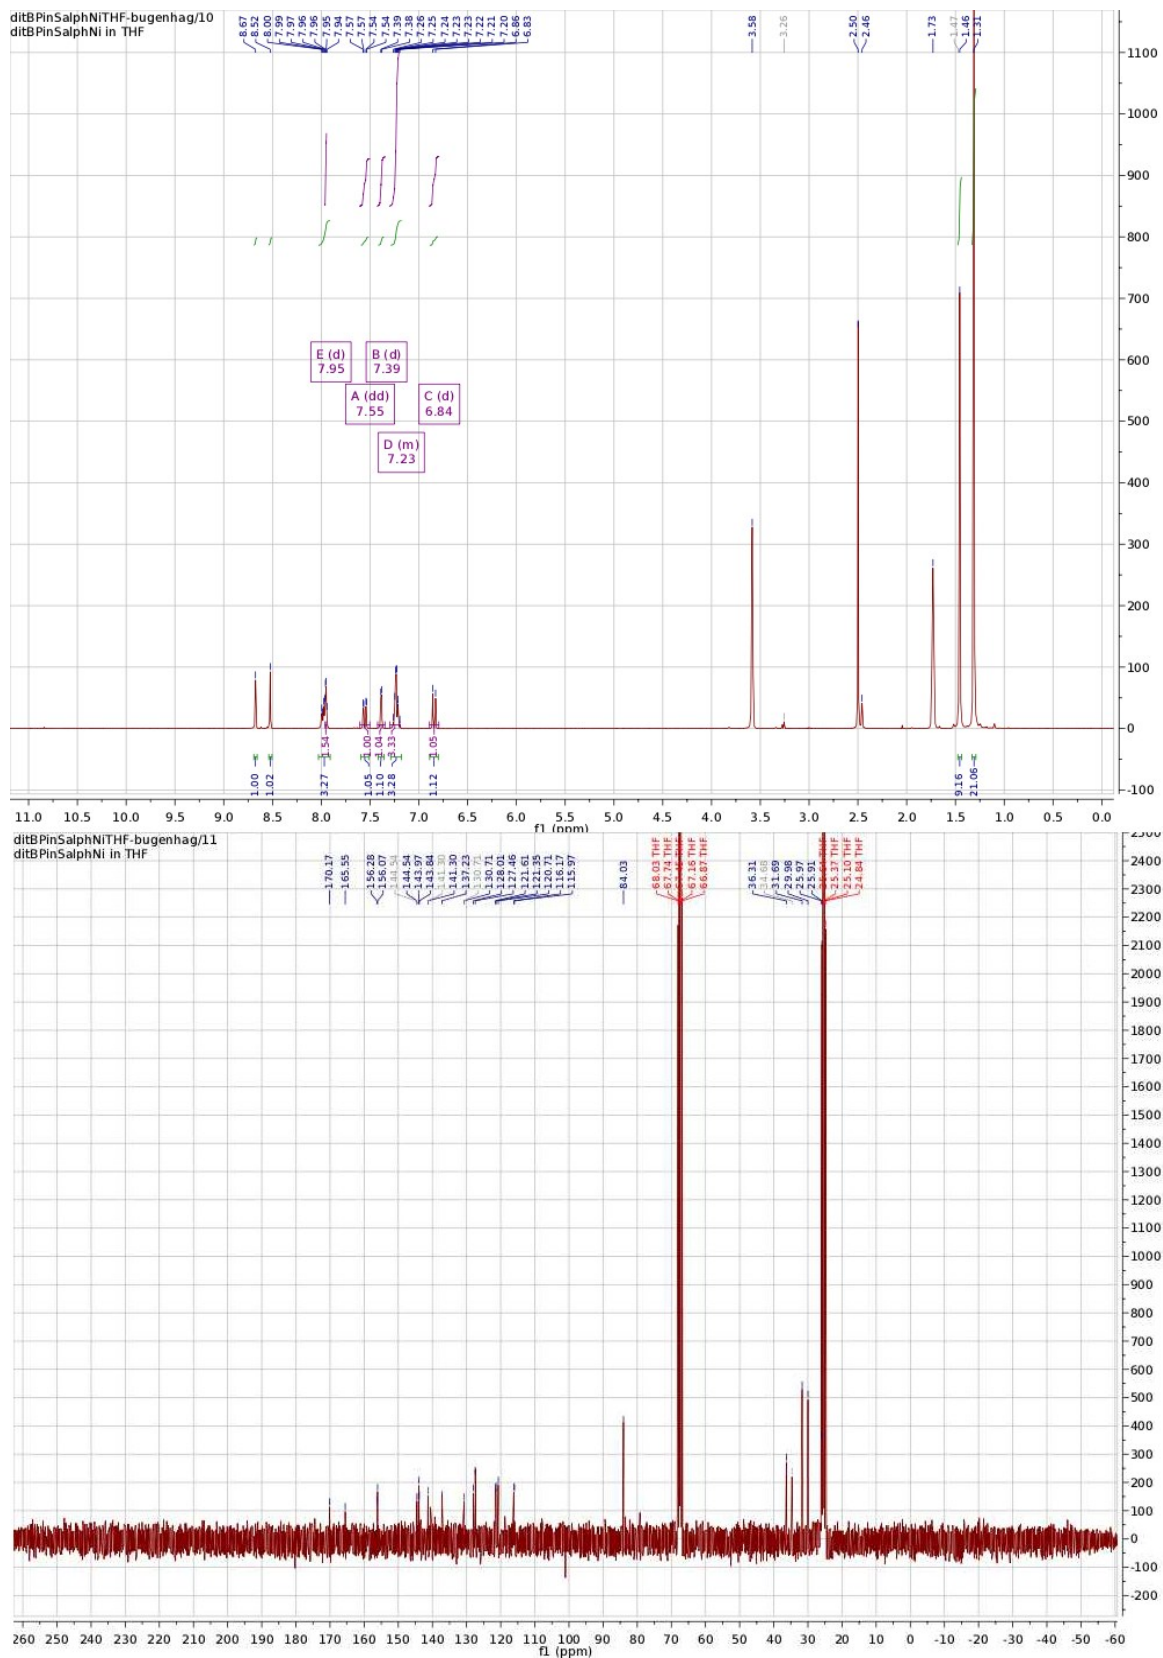

Figure S11:  $^1\text{H}$  (top) and  $^{13}\text{C}$  (bottom)-spectra of **6** measured in  $\text{THF-d}_8$ .

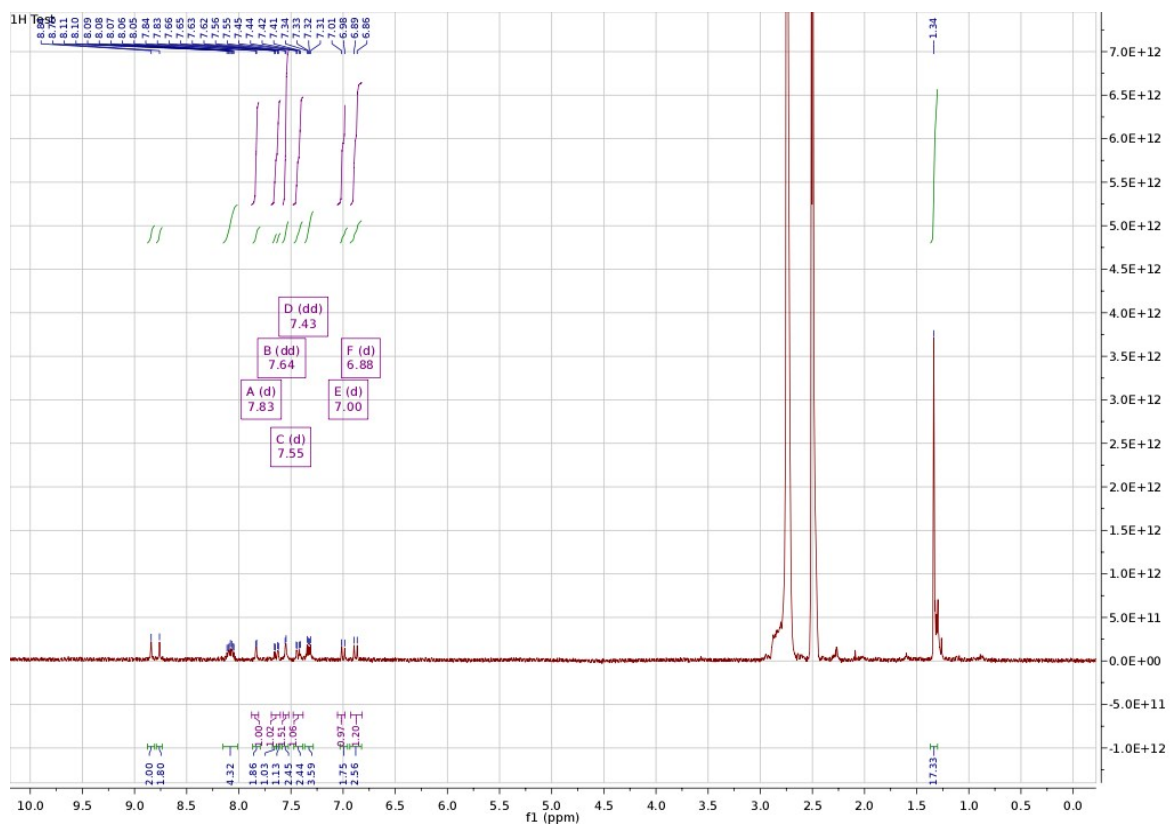

Figure S 81:  $^1\text{H}$ -NMR-spectra of **8** measured in  $\text{DMSO-d}_6$ .

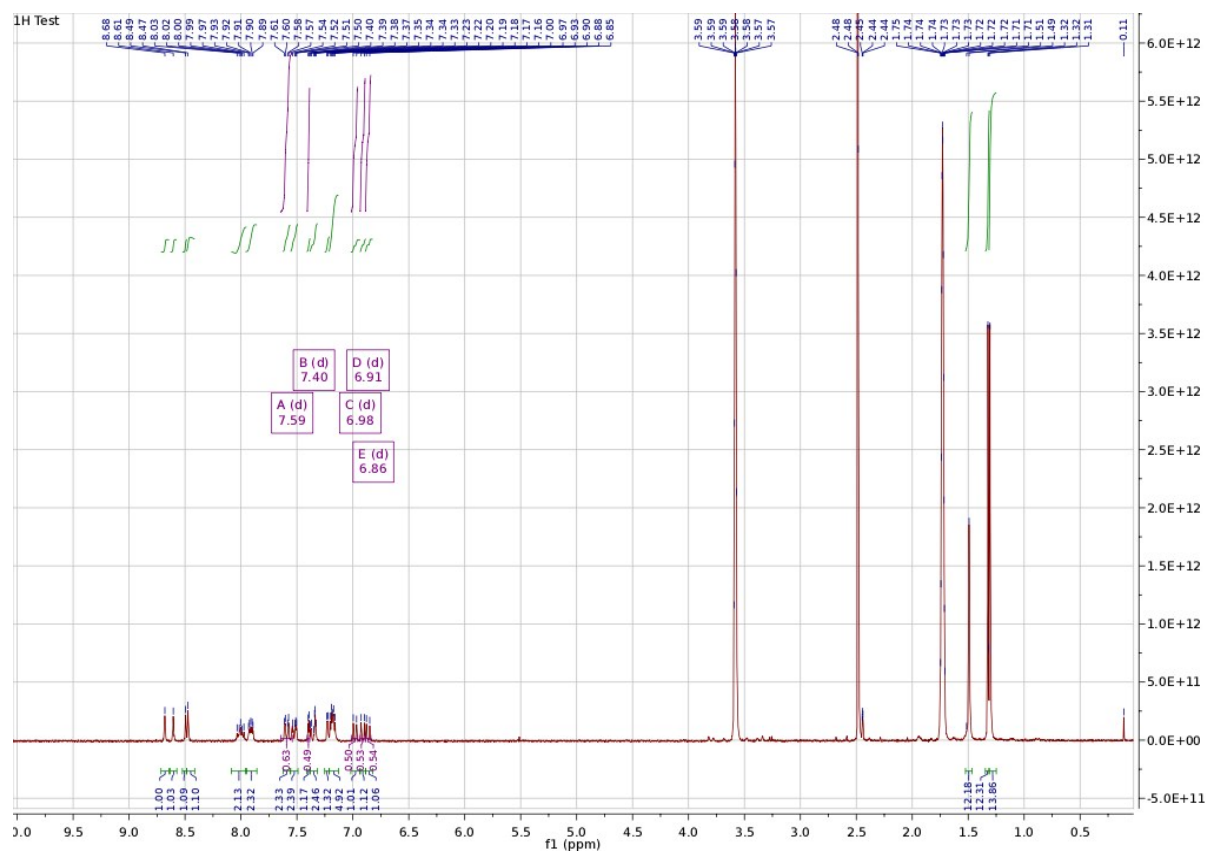

Figure S12:  $^1\text{H}$ -NMR-spectra of **9/10** measured in  $\text{THF-d}_8$ .

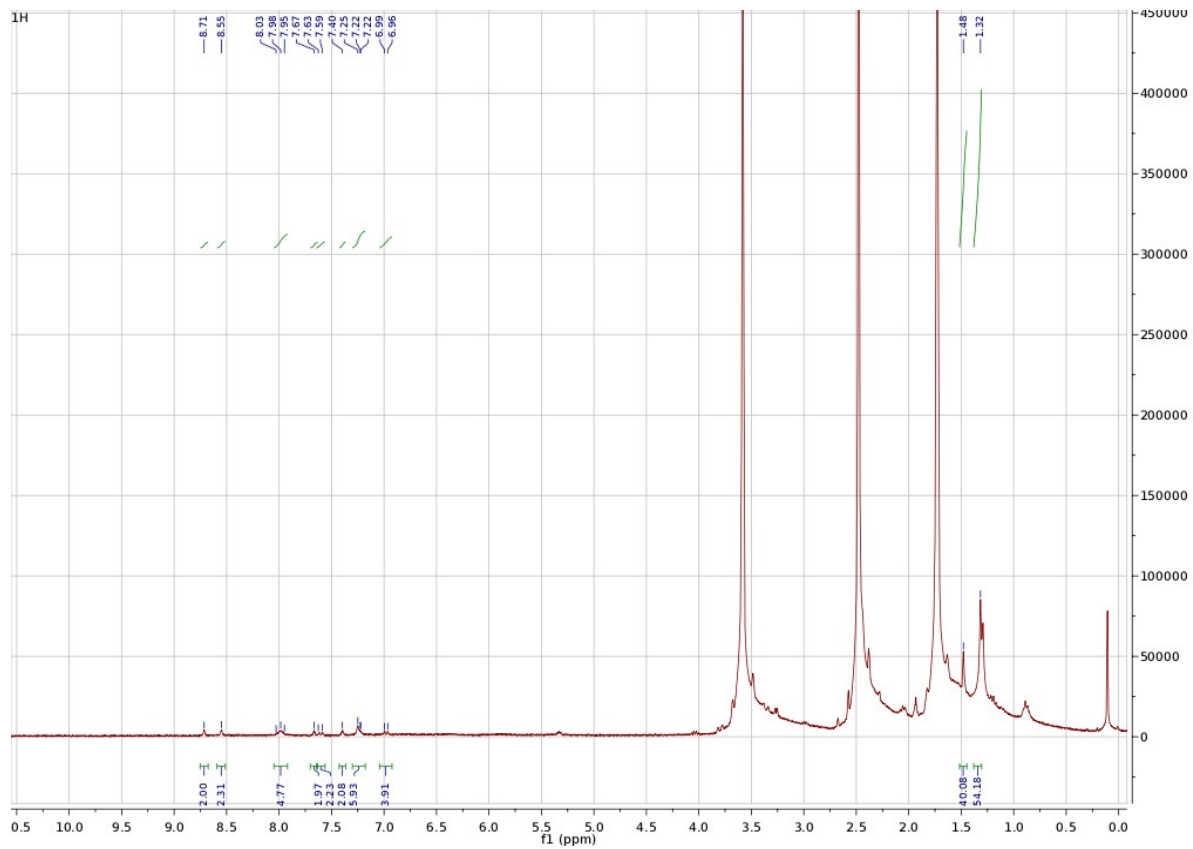

Figure S13: <sup>1</sup>H-NMR-spectra of **11** measured in THF-d<sub>8</sub>.

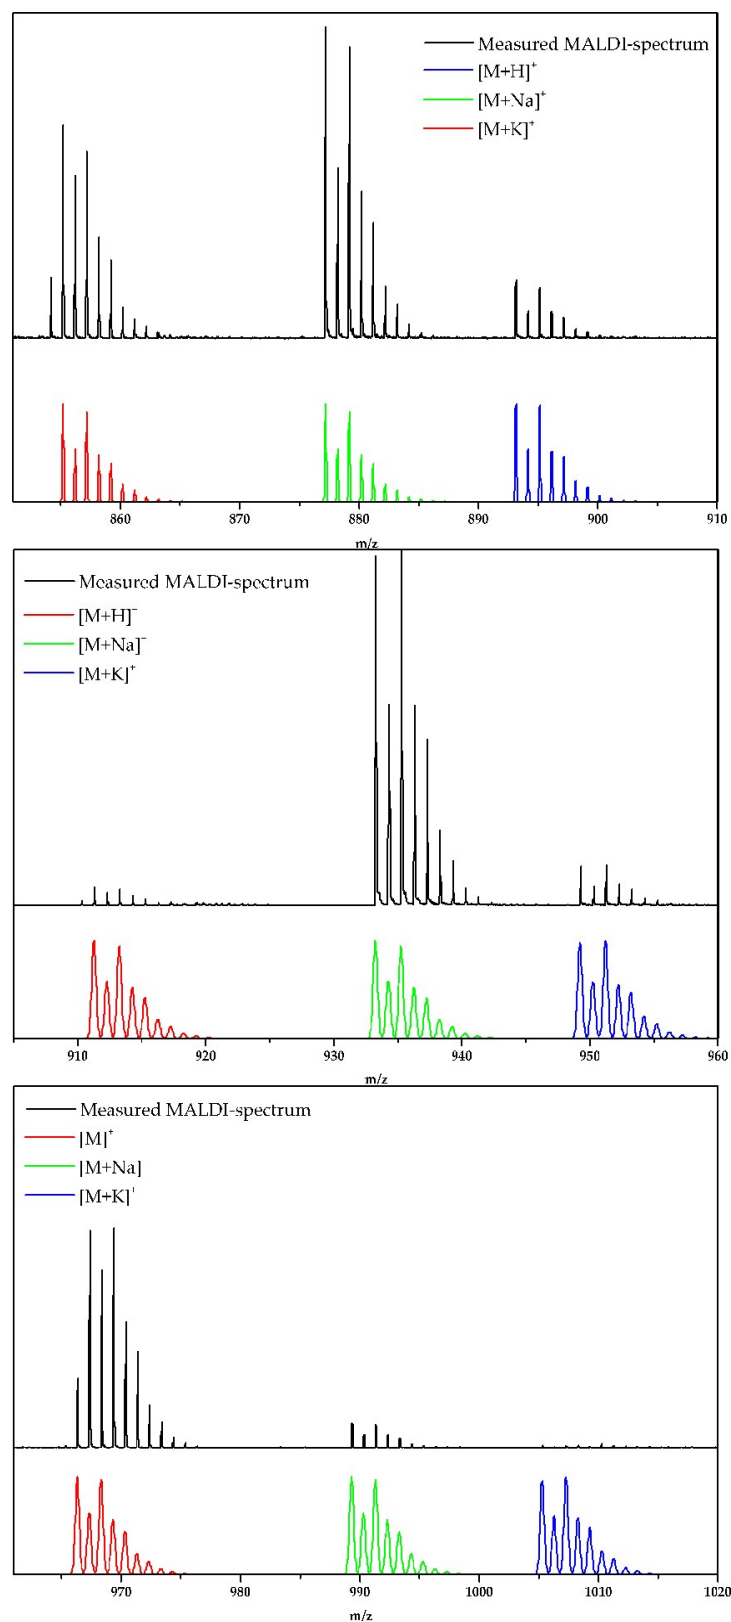

Figure S14: MALDI-MS-spectra of **8** (top), **9/10** (middle) and **11** (bottom). Black: experimental spectrum. red, green, blue: Simulated spectra of [M]<sup>+</sup> or [M+H]<sup>+</sup>, [M+Na]<sup>+</sup> and [M+K]<sup>+</sup>.

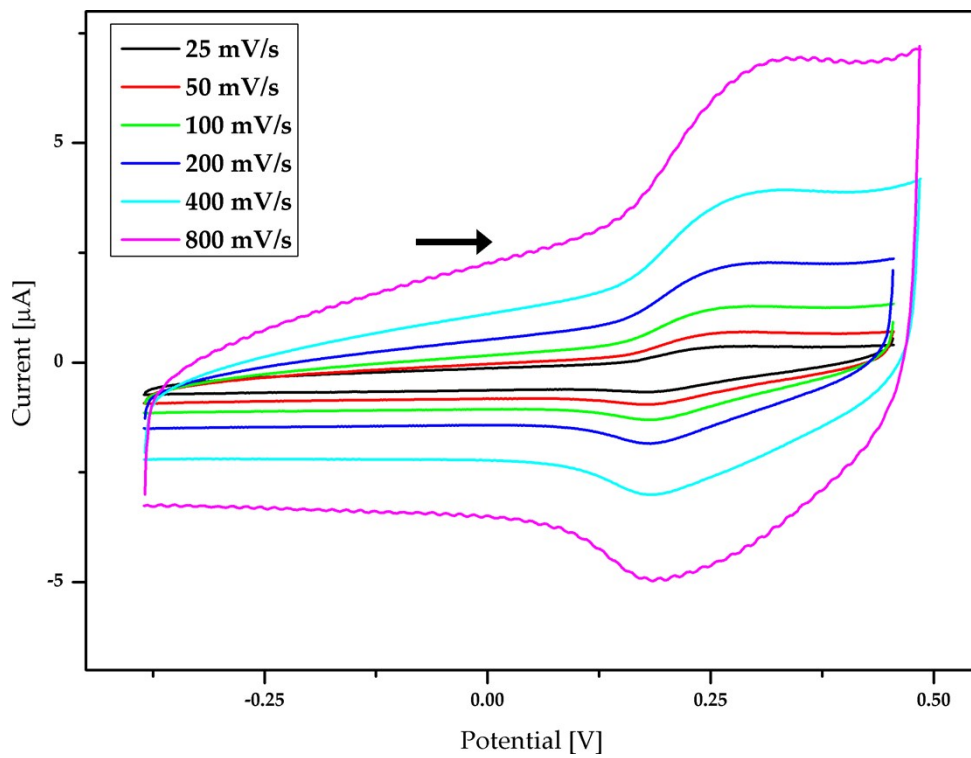

Figure S15: Cyclic voltammogram of the first Red/Ox-process of 11 at different scan-rates (dichloromethane, 0.1 M TBAP as supporting electrolyte, vs  $\text{Fc}^+/\text{Fc}$ ).
